# Supplementary material
Source: HighWire-hosted journal article supplement (https://bmjopen.bmj.com/content/12/7/e058494)
Supplement: inline-supplementary-material-2 [file inline-supplementary-material-2.pdf]

|             | Height   | Weight   | TNN      | CKMB     | ALT      | AST      | GLUCOSE  | TC       | TG       |
|-------------|----------|----------|----------|----------|----------|----------|----------|----------|----------|
| EDUCATIO    | 0.02913  | 0.055647 | -0.05317 | -0.05676 | 0.01695  | 0.01695  | 0.023985 | 0.030241 | 0.030241 |
| SEX         | 0.007129 | 0.093293 | -0.03545 | 0.003078 | 0.057993 | 0.057993 | 0.026542 | 0.069682 | 0.069682 |
| HEART_RA    | -0.01445 | 0.053069 | 0.018044 | 0.06037  | 0.023171 | 0.023171 | 0.003911 | -0.00426 | -0.00426 |
| SBP         | 0.00442  | -0.02208 | -0.06454 | -0.05299 | -0.01744 | -0.01744 | -0.00707 | -0.03745 | -0.03745 |
| DBP         | -0.00181 | -0.04003 | -0.04298 | -0.03426 | -0.01947 | -0.01947 | -0.00659 | -0.06116 | -0.06116 |
| HEIGHT      | NA       | -0.06361 | -0.01276 | -0.046   | -0.01207 | -0.01207 | -0.03706 | -0.05216 | -0.05216 |
| WEIGHT      | -0.07362 | NA       | 0.028336 | 0.027332 | -0.02608 | -0.02608 | -0.10278 | -0.09594 | -0.09594 |
| TNN         | -0.00844 | -0.01182 | NA       | -0.03343 | -0.02478 | -0.02478 | 0.007079 | 0.04947  | 0.04947  |
| CKMB        | -0.02833 | -0.034   | NA       | NA       | -0.03486 | -0.03486 | -0.01463 | 0.009948 | 0.009948 |
| PCV         | -0.02513 | -0.05208 | 0.002071 | 0.004382 | -0.00953 | -0.00953 | 0.00904  | -0.01305 | -0.01305 |
| PLT         | 0.008348 | 0.060348 | -0.01715 | -0.00331 | 0.078015 | 0.078015 | -0.01587 | 0.035198 | 0.035198 |
| Scr         | 0.109531 | 0.074243 | -0.03693 | -0.03251 | -0.015   | -0.015   | -0.01027 | -0.02538 | -0.02538 |
| ALT         | -0.02707 | 0.017845 | -0.0115  | -0.019   | NA       | NA       | 0.003878 | -0.01109 | -0.01109 |
| AST         | 0.001469 | 0.03518  | 0.014632 | -0.00035 | NA       | NA       | -0.01337 | -0.04121 | -0.04121 |
| GLUCOSE     | -0.03405 | -0.06013 | 0.009746 | 0.030197 | -0.01017 | -0.01017 | NA       | 0.015694 | 0.015694 |
| TC          | -0.07257 | -0.06865 | -0.01783 | -0.00725 | NA       | NA       | NA       | NA       | NA       |
| TG          | -0.0296  | -0.09382 | 0.01657  | 0.008628 | NA       | NA       | NA       | NA       | NA       |
| HDL         | 0.015517 | 0.027903 | -0.03972 | -0.04779 | NA       | NA       | NA       | NA       | NA       |
| LDL         | -0.052   | -0.05408 | -0.03104 | -0.01395 | NA       | NA       | NA       | NA       | NA       |
| INR         | -0.00474 | -0.00769 | -0.00451 | -0.00471 | -0.00238 | -0.00238 | -0.00193 | -0.00335 | -0.00335 |
| BNP         | 0.057263 | 0.115165 | -0.0246  | 0.064959 | 0.067578 | 0.067578 | 0.080024 | 0.073339 | 0.073339 |
| outcome     | 0.099276 | 0.04163  | 0.029737 | 0.05036  | -0.01314 | -0.01314 | -0.01859 | 0.029737 | 0.029737 |
| Angina hist | 0.095718 | 0.056706 | -0.04931 | -0.05458 | -0.01636 | -0.01636 | -0.02315 | -0.01951 | -0.01951 |
| MI history  | 0.041474 | 0.006818 | 0.074095 | 0.061965 | -0.00847 | -0.00847 | -0.01198 | -0.02553 | -0.02553 |
| PCI history | 0.03125  | 0.041303 | 0.001463 | -0.0059  | -0.01191 | -0.01191 | -0.01686 | -0.03591 | -0.03591 |
| CABG histc  | -0.0189  | 0.002349 | -0.0088  | -0.00974 | -0.00292 | -0.00292 | -0.00413 | -0.0088  | -0.0088  |
| AF history  | 0.003701 | 0.066524 | -0.01577 | 0.052965 | -0.00523 | -0.00523 | -0.00741 | -0.01577 | -0.01577 |
| HF history  | -0.02566 | 0.065512 | -0.01194 | -0.01322 | -0.00396 | -0.00396 | -0.00561 | 0.089766 | 0.089766 |
| hypertensi  | 0.003387 | -0.05653 | -0.04928 | -0.02988 | 0.024303 | 0.024303 | -0.01738 | -0.02477 | -0.02477 |
| diabetes hi | 0.008359 | -0.00846 | -0.00863 | -0.02016 | -0.02035 | -0.02035 | -0.0288  | -0.00863 | -0.00863 |
| tia history | 0.045444 | 0.056007 | -0.03294 | -0.00017 | -0.01093 | -0.01093 | -0.01546 | -0.03294 | -0.03294 |
| pvd history | -0.01334 | 0.029066 | -0.00621 | -0.00687 | -0.00206 | -0.00206 | -0.00291 | -0.00621 | -0.00621 |
| copd histo  | 0.005632 | 0.026679 | -0.01534 | -0.01698 | -0.00509 | -0.00509 | -0.0072  | -0.01534 | -0.01534 |
| kidney fail | 0.058319 | 0.020634 | -0.0135  | -0.01494 | -0.00448 | -0.00448 | -0.00634 | -0.0135  | -0.0135  |
| smoking hi  | 0.020236 | -0.02593 | 0.019303 | 0.001473 | -0.02639 | -0.02639 | -0.03734 | -0.03012 | -0.03012 |
| alcohol cor | 0.040072 | 0.059005 | -0.03003 | -0.03324 | -0.00996 | -0.00996 | -0.0141  | 0.013242 | 0.013242 |
| hypertensi  | -0.01724 | 0.009228 | -0.00802 | -0.00888 | -0.00266 | -0.00266 | -0.00377 | -0.00802 | -0.00802 |
| age         | 0.067996 | 0.08987  | -0.00371 | 0.010875 | 0.023463 | 0.023463 | 0.033202 | 0.045915 | 0.045915 |

| HDL      | LDL      | INR      | BNP      |
|----------|----------|----------|----------|
| 0.030241 | 0.030241 | -0.04047 | -0.04938 |
| 0.069682 | 0.069682 | -0.0295  | -0.02327 |
| -0.00426 | -0.00426 | 0.040492 | -0.0284  |
| -0.03745 | -0.03745 | -0.01432 | -0.0233  |
| -0.06116 | -0.06116 | 0.02475  | 0.001733 |
| -0.05216 | -0.05216 | 0.068716 | -0.00483 |
| -0.09594 | -0.09594 | 0.098804 | 0.012392 |
| 0.04947  | 0.04947  | 0.012218 | -0.03841 |
| 0.009948 | 0.009948 | 0.02502  | -0.07024 |
| -0.01305 | -0.01305 | -0.015   | 0.002114 |
| 0.035198 | 0.035198 | 0.012574 | -0.07051 |
| -0.02538 | -0.02538 | 0.06571  | -0.0301  |
| -0.01109 | -0.01109 | 0.03981  | -0.02417 |
| -0.04121 | -0.04121 | 0.072957 | -0.04395 |
| 0.015694 | 0.015694 | 0.014764 | 0.012239 |
| NA       | NA       | -0.03384 | -0.02774 |
| NA       | NA       | -0.02357 | -0.01175 |
| NA       | NA       | -0.05423 | -0.03744 |
| NA       | NA       | -0.01677 | -0.04389 |
| -0.00335 | -0.00335 | NA       | -0.00432 |
| 0.073339 | 0.073339 | 0.041583 | NA       |
| 0.029737 | 0.029737 | 0.026992 | 0.025309 |
| -0.01951 | -0.01951 | 0.03755  | 0.001304 |
| -0.02553 | -0.02553 | -0.00811 | 0.003338 |
| -0.03591 | -0.03591 | 0.039787 | -0.04809 |
| -0.0088  | -0.0088  | 0.074653 | -0.01178 |
| -0.01577 | -0.01577 | -0.02486 | -0.02112 |
| 0.089766 | 0.089766 | 0.046745 | -0.01599 |
| -0.02477 | -0.02477 | 0.020652 | 0.005802 |
| -0.00863 | -0.00863 | 0.056261 | -0.02259 |
| -0.03294 | -0.03294 | 0.025583 | -0.01392 |
| -0.00621 | -0.00621 | -0.00978 | -0.00831 |
| -0.01534 | -0.01534 | -0.02418 | -0.02055 |
| -0.0135  | -0.0135  | -0.02127 | -0.01808 |
| -0.03012 | -0.03012 | 0.041923 | 0.005166 |
| 0.013242 | 0.013242 | 0.064257 | -0.00762 |
| -0.00802 | -0.00802 | -0.01264 | -0.01074 |
| 0.045915 | 0.045915 | 0.015482 | -0.01742 |
